# Supplementary material for: The Role of Foot-Loading Factors and Their Associations with Ulcer Development and Ulcer Healing in People with Diabetes: A Systematic Review
Source: MDPI journal article supplement (doi:10.3390/jcm9113591), 2020-11-07
Supplement: s1 [file s1]

**Table S1.** Risk of bias assessment: QUIPS tool.

|                                                       | Study Participation         |                                  |                    |                      |                                  |                           |                          | Study Attrition             |                                      |                                           |                              |                       | Prognostic Factor                      |                         |                              |                                |                                    | Outcome Measurement |                           | Study Confounding   |                           |                       |                                |                    |                             |                                | Statistical Analysis and Reporting |                                |                    |                     |                                           |                                       |                           |                                     |                                     |                                             |                      |                                            |   |   |
|-------------------------------------------------------|-----------------------------|----------------------------------|--------------------|----------------------|----------------------------------|---------------------------|--------------------------|-----------------------------|--------------------------------------|-------------------------------------------|------------------------------|-----------------------|----------------------------------------|-------------------------|------------------------------|--------------------------------|------------------------------------|---------------------|---------------------------|---------------------|---------------------------|-----------------------|--------------------------------|--------------------|-----------------------------|--------------------------------|------------------------------------|--------------------------------|--------------------|---------------------|-------------------------------------------|---------------------------------------|---------------------------|-------------------------------------|-------------------------------------|---------------------------------------------|----------------------|--------------------------------------------|---|---|
|                                                       | Source or target population | Method identification population | Recruitment period | Place of recruitment | Inclusion and exclusion criteria | Adequate study population | Baseline characteristics | Summary study participation | Proportion baseline sample available | Attempts collecting information drop-outs | Reasons and impact drop-outs | Description drop-outs | No difference drop-outs and completers | Summary study attrition | Definition prognostic factor | Valid and reliable measurement | Continuous variables or cut-points | Method and setting  | Proportion data available | Method missing data | Summary prognostic factor | Definition of outcome | Valid and reliable measurement | Method and setting | Summary outcome measurement | Important confounders measured | Definition confounders             | Valid and reliable measurement | Method and setting | Method missing data | Confounders accounted for in study design | Confounders accounted for in analysis | Summary study confounding | Presentation of analytical strategy | Appropriate strategy model building | Statistical model adequate for study design | Reporting of results | Summary statistical analysis and reporting |   |   |
| Armstrong et al. 1998 [1]                             | +                           | -                                | -                  | -                    | ±                                | ?                         | +                        | H                           | +                                    | +                                         | +                            | +                     | +                                      | +                       | L                            | +                              | +                                  | +                   | +                         | +                   | L                         | -                     | ?                              | +                  | H                           | +                              | +                                  | +                              | +                  | +                   | +                                         | +                                     | L                         | ±                                   | +                                   | +                                           | +                    | +                                          | L |   |
| Armstrong et al. 2004 [2]                             | +                           | ±                                | -                  | -                    | ±                                | ?                         | +                        | H                           | +                                    | +                                         | +                            | +                     | +                                      | +                       | L                            | -                              | +                                  | +                   | +                         | +                   | M                         | -                     | -                              | ?                  | H                           | ±                              | ±                                  | +                              | +                  | +                   | ±                                         | -                                     | -                         | H                                   | +                                   | -                                           | -                    | +                                          | M |   |
| Chantelau et al. 1994 [3]                             | ±                           | -                                | -                  | -                    | +                                | ?                         | ±                        | H                           | +                                    | +                                         | +                            | +                     | +                                      | +                       | L                            | +                              | ±                                  | +                   | +                         | +                   | M                         | -                     | ±                              | +                  | H                           | ±                              | -                                  | ?                              | +                  | +                   | -                                         | -                                     | -                         | H                                   | +                                   | -                                           | -                    | +                                          | M |   |
| Connor et al. 2004 [4]                                | +                           | -                                | +                  | -                    | +                                | ±                         | +                        | M                           | ?                                    | ?                                         | ?                            | ?                     | ?                                      | ?                       | H                            | ±                              | -                                  | -                   | ?                         | +                   | +                         | H                     | ±                              | ±                  | ±                           | H                              | +                                  | ±                              | ±                  | +                   | +                                         | -                                     | -                         | -                                   | H                                   | +                                           | -                    | -                                          | + | M |
| Crews et al. 2016 [5]                                 | +                           | -                                | +                  | ±                    | +                                | ?                         | +                        | M                           | +                                    | -                                         | +                            | +                     | ±                                      | ±                       | L                            | +                              | +                                  | +                   | +                         | ±                   | ±                         | L                     | ±                              | ±                  | +                           | M                              | ±                                  | +                              | +                  | +                   | -                                         | +                                     | +                         | M                                   | +                                   | ±                                           | +                    | ±                                          | M |   |
| Deschamps et al. 2016 [6]                             | +                           | -                                | +                  | +                    | +                                | ?                         | +                        | L                           | +                                    | +                                         | +                            | +                     | +                                      | +                       | L                            | +                              | +                                  | +                   | +                         | +                   | L                         | ±                     | ±                              | +                  | M                           | +                              | +                                  | ±                              | +                  | +                   | -                                         | -                                     | -                         | H                                   | +                                   | -                                           | -                    | +                                          | M |   |
| Jarl et al. 2017 [7]                                  | +                           | -                                | -                  | -                    | +                                | ?                         | ±                        | H                           | +                                    | +                                         | +                            | +                     | +                                      | +                       | L                            | ±                              | +                                  | ±                   | +                         | +                   | +                         | M                     | +                              | -                  | +                           | M                              | -                                  | -                              | ?                  | ?                   | +                                         | -                                     | -                         | -                                   | H                                   | -                                           | -                    | -                                          | H |   |
| Kästenbauer et al. 2001 [8] and Grimm et al. 2004 [9] | +                           | -                                | -                  | -                    | +                                | +                         | +                        | M                           | +                                    | -                                         | -                            | -                     | -                                      | -                       | H                            | +                              | +                                  | +                   | +                         | +                   | -                         | L                     | +                              | -                  | +                           | M                              | +                                  | +                              | +                  | +                   | ±                                         | ±                                     | ±                         | M                                   | +                                   | ±                                           | ±                    | +                                          | M |   |
| Lavery et al. 2003 [10]                               | +                           | -                                | -                  | +                    | -                                | +                         | ±                        | H                           | +                                    | +                                         | +                            | +                     | +                                      | +                       | L                            | +                              | +                                  | +                   | +                         | +                   | L                         | -                     | -                              | ?                  | H                           | ±                              | +                                  | +                              | ?                  | +                   | ±                                         | -                                     | -                         | H                                   | +                                   | -                                           | -                    | +                                          | M |   |
| Ledoux et al. 2013 [11]                               | +                           | -                                | +                  | +                    | +                                | +                         | +                        | L                           | ±                                    | +                                         | +                            | -                     | +                                      | M                       | +                            | ±                              | +                                  | ±                   | +                         | ?                   | M                         | +                     | -                              | +                  | M                           | +                              | +                                  | +                              | +                  | ?                   | +                                         | +                                     | L                         | +                                   | +                                   | +                                           | +                    | L                                          |   |   |
| Lemaster et al. 2003 [12]                             | ±                           | -                                | -                  | +                    | +                                | +                         | +                        | M                           | +                                    | +                                         | +                            | +                     | +                                      | +                       | L                            | +                              | ±                                  | ±                   | +                         | +                   | M                         | +                     | +                              | +                  | L                           | +                              | +                                  | +                              | +                  | ?                   | +                                         | +                                     | L                         | +                                   | +                                   | +                                           | +                    | L                                          |   |   |
| Mueller et al. 2013 [13]                              | +                           | +                                | +                  | +                    | +                                | +                         | +                        | L                           | +                                    | +                                         | +                            | +                     | +                                      | +                       | L                            | +                              | ±                                  | +                   | +                         | +                   | L                         | +                     | +                              | +                  | L                           | +                              | +                                  | +                              | +                  | -                   | -                                         | -                                     | H                         | +                                   | -                                   | -                                           | +                    | M                                          |   |   |
| Murray et al. 1996 [14]                               | +                           | -                                | -                  | +                    | +                                | ?                         | ±                        | M                           | +                                    | +                                         | +                            | +                     | +                                      | +                       | L                            | ±                              | +                                  | -                   | +                         | +                   | M                         | ±                     | ±                              | +                  | M                           | ±                              | ±                                  | +                              | +                  | +                   | -                                         | -                                     | -                         | H                                   | +                                   | -                                           | -                    | ?                                          | M |   |
| Najafi et al. 2017 [15]                               | +                           | -                                | -                  | +                    | +                                | ?                         | -                        | H                           | +                                    | -                                         | +                            | -                     | ?                                      | ?                       | M                            | +                              | +                                  | +                   | ?                         | +                   | -                         | M                     | +                              | +                  | +                           | L                              | ±                                  | ±                              | ±                  | +                   | -                                         | -                                     | -                         | H                                   | +                                   | -                                           | -                    | ±                                          | H |   |
| Pham et al. 2000 [16] and Caselli et al. 2002 [17]    | +                           | -                                | -                  | +                    | -                                | +                         | +                        | M                           | +                                    | +                                         | +                            | +                     | +                                      | +                       | L                            | +                              | +                                  | +                   | +                         | +                   | L                         | -                     | ?                              | ?                  | H                           | +                              | +                                  | +                              | +                  | +                   | +                                         | +                                     | +                         | L                                   | +                                   | +                                           | +                    | +                                          | L |   |
| Qiu et al. 2015 [18]                                  | +                           | +                                | +                  | +                    | +                                | +                         | +                        | L                           | +                                    | +                                         | +                            | +                     | +                                      | +                       | L                            | ±                              | ?                                  | +                   | +                         | +                   | M                         | -                     | ?                              | +                  | H                           | +                              | +                                  | +                              | +                  | +                   | ±                                         | ±                                     | M                         | ±                                   | -                                   | -                                           | +                    | H                                          |   |   |
| Schneider et al. 2019 [19]                            | +                           | -                                | -                  | +                    | +                                | -                         | +                        | H                           | +                                    | -                                         | -                            | -                     | ±                                      | M                       | +                            | +                              | +                                  | +                   | +                         | ?                   | L                         | -                     | +                              | ?                  | H                           | +                              | +                                  | +                              | +                  | ±                   | -                                         | -                                     | -                         | H                                   | +                                   | -                                           | -                    | +                                          | M |   |
| Ullbrecht et al. 2014 [20]                            | +                           | +                                | -                  | +                    | +                                | +                         | +                        | L                           | +                                    | +                                         | +                            | +                     | +                                      | +                       | L                            | +                              | +                                  | +                   | +                         | +                   | L                         | +                     | +                              | +                  | L                           | +                              | ±                                  | +                              | ?                  | +                   | -                                         | -                                     | M                         | +                                   | -                                   | -                                           | +                    | M                                          |   |   |
| Van Netten et al. 2018 [21]                           | +                           | -                                | +                  | +                    | +                                | ±                         | +                        | L                           | +                                    | +                                         | +                            | +                     | +                                      | +                       | L                            | +                              | +                                  | +                   | +                         | +                   | L                         | +                     | ±                              | +                  | M                           | +                              | ±                                  | ±                              | ±                  | +                   | -                                         | -                                     | -                         | M                                   | +                                   | ±                                           | ±                    | +                                          | M |   |
| Waaijman et al. 2014 [22]                             | +                           | -                                | -                  | -                    | +                                | +                         | +                        | L                           | +                                    | ?                                         | -                            | +                     | +                                      | M                       | +                            | +                              | +                                  | +                   | ?                         | -                   | M                         | +                     | +                              | +                  | L                           | +                              | +                                  | +                              | +                  | +                   | +                                         | +                                     | +                         | L                                   | +                                   | +                                           | +                    | +                                          | L |   |

+ = yes (green), ± = partial (orange), - = no (red), ? = unsure (yellow). Summary domain score: L = low (green), M = moderate (orange) and H = high risk of bias (red).

**Table S2.** Risk of bias assessment: 21-item score.

|                                                       | Total Score* (Out of 17) | 21. No Commercial Interests | 20. Conclusions Supported by Findings | 19. Balanced Discussion | 18. Free from Errors of Reporting | 17. Comparable Results from Participating Centers | 16. Cohort Performance as Expected in Clinical Practice | 15. Appropriate Statistical Methods are Used | 13.Primary Outcome in >75% of those Recruited | 12. Completion of Recruitment | 11. Clinical Researcher Blinded to Group | 10. Assessor Primary Outcome Blinded to Group Allocation Primary Outcome | 9. Primary Outcome of Direct Clinical Relevance | 8. Power Calculation | 5. Other Components of Care | 4. Description Intervention | 2. Appropriate Study Population | 1. Appropriate Definition |
|-------------------------------------------------------|--------------------------|-----------------------------|---------------------------------------|-------------------------|-----------------------------------|---------------------------------------------------|---------------------------------------------------------|----------------------------------------------|-----------------------------------------------|-------------------------------|------------------------------------------|--------------------------------------------------------------------------|-------------------------------------------------|----------------------|-----------------------------|-----------------------------|---------------------------------|---------------------------|
| Armstrong et al. 1998 [1]                             | 11                       | +                           | +                                     | -                       | +                                 | +                                                 | +                                                       | +                                            | +                                             | ?                             | -                                        | -                                                                        | +                                               | -                    | +                           | +                           | +                               | -                         |
| Armstrong et al. 2004 [2]                             | 8                        | +                           | +                                     | -                       | ?                                 | ?                                                 | ?                                                       | +                                            | +                                             | ?                             | ?                                        | ?                                                                        | +                                               | -                    | +                           | +                           | +                               | -                         |
| Chantelau et al. 1994 [3]                             | 11                       | +                           | +                                     | -                       | +                                 | +                                                 | +                                                       | +                                            | +                                             | ?                             | ?                                        | ?                                                                        | +                                               | -                    | +                           | +                           | +                               | -                         |
| Connor et al. 2004 [4]                                | 9                        | +                           | +                                     | +                       | +                                 | +                                                 | +                                                       | +                                            | +                                             | ?                             | ?                                        | ?                                                                        | ?                                               | -                    | -                           | ?                           | +                               | -                         |
| Crews et al. 2016 [5]                                 | 10                       | +                           | +                                     | +                       | -                                 | -                                                 | ?                                                       | +                                            | +                                             | ?                             | -                                        | -                                                                        | +                                               | -                    | +                           | +                           | +                               | +                         |
| Deschamps et al. 2016 [6]                             | 9                        | +                           | +                                     | -                       | +                                 | ?                                                 | +                                                       | +                                            | +                                             | ?                             | ?                                        | ?                                                                        | +                                               | -                    | -                           | +                           | +                               | -                         |
| Jarl et al. 2017 [7]                                  | 12                       | +                           | +                                     | +                       | +                                 | +                                                 | +                                                       | -                                            | +                                             | ?                             | ?                                        | ?                                                                        | +                                               | -                    | +                           | +                           | +                               | +                         |
| Kästenbauer et al. 2001 [8] and Grimm et al. 2004 [9] | 13                       | +                           | +                                     | +                       | +                                 | +                                                 | +                                                       | +                                            | +                                             | ?                             | ?                                        | ?                                                                        | +                                               | -                    | +                           | +                           | +                               | +                         |
| Lavery et al. 2003 [10]                               | 10                       | +                           | +                                     | +                       | +                                 | ?                                                 | ?                                                       | +                                            | +                                             | ?                             | ?                                        | ?                                                                        | +                                               | -                    | +                           | +                           | +                               | -                         |
| Ledoux et al. 2013 [11]                               | 11                       | +                           | +                                     | +                       | +                                 | +                                                 | ?                                                       | +                                            | +                                             | ?                             | ?                                        | ?                                                                        | +                                               | -                    | ?                           | +                           | +                               | +                         |
| Lemaster et al. 2003 [12]                             | 11                       | +                           | +                                     | ?                       | +                                 | ?                                                 | ?                                                       | +                                            | +                                             | ?                             | +                                        | +                                                                        | +                                               | -                    | -                           | +                           | +                               | +                         |
| Mueller et al. 2013 [13]                              | 15                       | +                           | +                                     | +                       | +                                 | +                                                 | ?                                                       | +                                            | +                                             | +                             | +                                        | +                                                                        | +                                               | +                    | -                           | +                           | +                               | +                         |
| Murray et al. 1996 [14]                               | 10                       | +                           | +                                     | -                       | +                                 | +                                                 | +                                                       | +                                            | +                                             | ?                             | -                                        | -                                                                        | +                                               | -                    | -                           | +                           | +                               | -                         |
| Najafi et al. 2017 [15]                               | 12                       | +                           | +                                     | +                       | +                                 | -                                                 | ?                                                       | +                                            | +                                             | ?                             | ?                                        | ?                                                                        | +                                               | -                    | +                           | +                           | +                               | +                         |
| Pham et al. 2000 [16] and Caselli et al. 2002 [17]    | 9                        | +                           | +                                     | -                       | +                                 | ?                                                 | +                                                       | +                                            | +                                             | ?                             | ?                                        | ?                                                                        | +                                               | -                    | -                           | +                           | +                               | -                         |
| Qiu et al. 2015 [18]                                  | 8                        | +                           | ?                                     | -                       | +                                 | +                                                 | -                                                       | +                                            | +                                             | ?                             | ?                                        | ?                                                                        | +                                               | -                    | -                           | +                           | +                               | -                         |
| Schneider et al. 2019 [19]                            | 11                       | +                           | +                                     | +                       | +                                 | +                                                 | +                                                       | +                                            | +                                             | ?                             | ?                                        | ?                                                                        | +                                               | -                    | -                           | +                           | +                               | -                         |
| Ulbrecht et al. 2014 [20]                             | 16                       | -                           | +                                     | +                       | +                                 | +                                                 | +                                                       | +                                            | +                                             | +                             | +                                        | +                                                                        | +                                               | +                    | +                           | +                           | +                               | +                         |
| Van Netten et al. 2018 [21]                           | 13                       | +                           | +                                     | +                       | +                                 | ?                                                 | +                                                       | +                                            | +                                             | ?                             | -                                        | +                                                                        | +                                               | -                    | +                           | +                           | +                               | +                         |
| Waaijman et al. 2014 [22]                             | 12                       | +                           | +                                     | +                       | +                                 | ?                                                 | +                                                       | +                                            | +                                             | ?                             | -                                        | +                                                                        | +                                               | -                    | -                           | +                           | +                               | +                         |

Question 3, 6, 7 and 14 of the 21-item score are excluded (see Methods), so 17 items in total. + = yes (green), ? = unsure/unknown (orange), - = no (red). \* Total score is sum of +’s out of 17.

Table S3. Risk of bias assessment: SIGN.

|                           | Internal Validity                                                     |                                     |                                 |                               |                                                                  |                                 |                                                               |                                                             |                                                               |                                                                    |                                                                |                                         | Overall Assessment                                   |                                                                   |
|---------------------------|-----------------------------------------------------------------------|-------------------------------------|---------------------------------|-------------------------------|------------------------------------------------------------------|---------------------------------|---------------------------------------------------------------|-------------------------------------------------------------|---------------------------------------------------------------|--------------------------------------------------------------------|----------------------------------------------------------------|-----------------------------------------|------------------------------------------------------|-------------------------------------------------------------------|
|                           | 1.1 Clear research question and listed inclusion / exclusion criteria | 1.2 Comprehensive literature search | 1.3 Two people selected studies | 1.4 Two people extracted data | 1.5 Status of publication was not used as an inclusion criterion | 1.6 Excluded studies are listed | 1.7 Relevant characteristics of included studies are provided | 1.8 Assessment and reporting of quality of included studies | 1.9 Scientific quality of included studies appropriately used | 1.10 Appropriate methods used to combine individual study findings | 1.11 Likelihood of publication bias was assessed appropriately | 1.12 Conflicts of interest are declared | 2.1 Overall assessment of the methodological quality | 2.2 Results are directly applicable to the patient group targeted |
| Crawford et al. 2007 [23] | yes                                                                   | yes                                 | yes                             | can't say                     | yes                                                              | yes                             | no                                                            | yes                                                         | yes                                                           | yes                                                                | no                                                             | no                                      | high quality                                         | yes                                                               |

**Table S4.** Plantar pressure - ulcer development.

| Reference                                                                                                                                                                                   | Population                                                                                                                                   | Risk of Bias                               | Ulcer Outcome                                                                                                                                              | Factor + Outcomes                                                                                                                                                                                                            | Conclusion                                                                                                                                                                                                                                |
|---------------------------------------------------------------------------------------------------------------------------------------------------------------------------------------------|----------------------------------------------------------------------------------------------------------------------------------------------|--------------------------------------------|------------------------------------------------------------------------------------------------------------------------------------------------------------|------------------------------------------------------------------------------------------------------------------------------------------------------------------------------------------------------------------------------|-------------------------------------------------------------------------------------------------------------------------------------------------------------------------------------------------------------------------------------------|
| Crawford et al. 2007 [23]<br>Meta-analysis                                                                                                                                                  | Pham et al. 2000 and<br>Lavery et al. 2003                                                                                                   | SIGN: High quality study                   | Pham et al. 2000<br>Ulcerated: 29% ( <i>n</i> = 73)<br>Lavery et al. 2003<br>Ulcerated: 16% ( <i>n</i> = 263)<br>Total<br>Ulcerated: 21% ( <i>n</i> = 336) | Barefoot PP:<br>Pham et al. 2000<br>Weight: 36.59%<br>SMD: 0.62, 95% CI: (0.35, 0.90)<br>Lavery et al. 2003<br>Weight: 63.41%<br>SMD: 0.38, 95% CI: (0.25, 0.52)<br>Total<br>Weight: 100%<br>SMD: 0.47, 95% CI: (0.24; 0.77) | Associated ( $Z = 4.05, p < 0.0001$ )                                                                                                                                                                                                     |
| Pham et al. 2000 [16] and Caselli et al. 2002 [17] *<br>Prospective cohort study<br>Period: not presented<br>Location: Boston, MA; San Antonio, TX; San Francisco, CA, USA<br>(multicenter) | N: 248<br>Male: 50%<br>Age: 58 ± 12 years<br>Type 2: 80%<br>Neuropathy: 84%<br>Risk classification: not presented                            | QUIPS: M-L-L-H-L-L<br>21-item score: 9/17  | At 30 (6–40) months:<br>Ulcerated: 29% ( <i>n</i> = 73)                                                                                                    | Barefoot PP (kPa):<br>Ulcerated: 706 ± 373<br>Non-ulcerated: 522 ± 255                                                                                                                                                       | Associated ( <i>p</i> < 0.001)                                                                                                                                                                                                            |
|                                                                                                                                                                                             |                                                                                                                                              |                                            | At 30 (6–40) months:<br>≥588 kPa: 45% ulcerated ( <i>n</i> = 173)<br><588 kPa: 34% ulcerated ( <i>n</i> = 75)                                              | Barefoot cut-off PP ≥588 kPa                                                                                                                                                                                                 | Associated (OR: 3.2, 95% CI: (2.0; 5.1), <i>p</i> < 0.001 (univariate), OR: 2.0, 95% CI: (1.2; 3.3), <i>p</i> = 0.007 (multivariate Pham et al. 2000) and OR: 1.8, 95% CI: (1.0-3.0), <i>p</i> = 0.03 (multivariate Caselli et al. 2002)) |
|                                                                                                                                                                                             |                                                                                                                                              |                                            | At 30 (6–40) months:<br>Number of participants and percentage ulceration per group not presented                                                           | Barefoot forefoot-to-rearfoot PP ratio >2                                                                                                                                                                                    | Associated (OR: 2.7, 95% CI: (1.7; 4.3), <i>p</i> = 0.001 (univariate) and OR: 1.8, 95% CI: (1.1; 3.2), <i>p</i> = 0.03 (multivariate))                                                                                                   |
| Lavery et al. 2003 [10]<br>Prospective cohort study<br>Period: not presented<br>Location: San Antonio, TX, USA<br>(monocenter)                                                              | N: 1666<br>Male: 50.4%<br>Age: 69.1 ± 11.1 years<br>Type 2: not presented<br>Neuropathy: not presented<br>Risk classification: not presented | QUIPS: H-L-L-H-H-M<br>21-item score: 10/17 | At 24 (20–29) months:<br>Ulcerated: 16% ( <i>n</i> = 263)                                                                                                  | Barefoot PP (kPa):<br>Ulcerated: 955 ± 264<br>Non-ulcerated: 851 ± 273                                                                                                                                                       | Associated ( <i>p</i> < 0.001)                                                                                                                                                                                                            |
|                                                                                                                                                                                             |                                                                                                                                              |                                            | At 24 (20–29) months:<br>>875 kPa: 17% ulcerated<br><875 kPa: 10% ulcerated<br>Number of participants per group not presented †                            | Cut-off PP: >875 kPa                                                                                                                                                                                                         | Associated (OR: 2.0, 95% CI: (1.4; 2.9), <i>p</i> = 0.0001)                                                                                                                                                                               |
| Kästenbauer et al. 2001 [8] and Grimm et al. 2004 [9] †<br>Prospective cohort study<br>Period: 1994–1998<br>Location: Vienna, Austria<br>(monocenter)                                       | N: 187<br>Male: 55%<br>Age: 58.6 years<br>Type 2: 100%<br>Neuropathy: 38%<br>Risk classification: not presented                              | QUIPS: M-H-L-M-M-M<br>21-item score: 13/17 | At 3.6 years (mean):<br>Ulcerated: 5% ( <i>n</i> = 10)                                                                                                     | Barefoot PP (kPa):<br>Ulcerated: 785 (705; 1155)<br>Non-ulcerated: 605 (430; 800)                                                                                                                                            | Associated ( <i>p</i> < 0.01)                                                                                                                                                                                                             |
|                                                                                                                                                                                             |                                                                                                                                              |                                            | At 3.6 years (mean):<br>Number of participants and percentage ulceration per group (>2 SD / <2 SD) not presented                                           | Barefoot cut-off PP >2 SD compared to a healthy participant in at least one forefoot region                                                                                                                                  | Associated (RR: 6.3, 95% CI: (1.2; 32.7), <i>p</i> = 0.0291)                                                                                                                                                                              |
| Ulbrecht et al. 2014 [20]<br>Prospective randomized controlled trial<br>Period: not presented<br>Location: PA; IL; CA; AZ; OH; TX; CO, USA (multicenter)                                    | N: 130<br>Male: 78%<br>Age: 59.5 years<br>Type 2: not presented<br>Neuropathy: 100%<br>Risk classification: IWGDF 3: 100%                    | QUIPS: L-L-L-L-M-M<br>21-item score: 16/17 | At 15 months:<br>Ulcerated: 17% ( <i>n</i> = 22)<br>Non-ulcerative lesions: 25% ( <i>n</i> = 32)                                                           | Barefoot PP (kPa):<br>Ulcerated: 1131<br>Non-ulcerative lesions: 1042<br>Non-ulcerated: 984                                                                                                                                  | Associated ( <i>p</i> = 0.04)                                                                                                                                                                                                             |

|                                                                                                                                                                                                                                               |                                                                                                                                                                                                  |                                            |                                                                                                                                                                                                                                            |                                                                                                                                                                                                                                                                                                                                                                                                                                                                                                                                |                                                                                                                                                                                                                                                                                                                                                             |
|-----------------------------------------------------------------------------------------------------------------------------------------------------------------------------------------------------------------------------------------------|--------------------------------------------------------------------------------------------------------------------------------------------------------------------------------------------------|--------------------------------------------|--------------------------------------------------------------------------------------------------------------------------------------------------------------------------------------------------------------------------------------------|--------------------------------------------------------------------------------------------------------------------------------------------------------------------------------------------------------------------------------------------------------------------------------------------------------------------------------------------------------------------------------------------------------------------------------------------------------------------------------------------------------------------------------|-------------------------------------------------------------------------------------------------------------------------------------------------------------------------------------------------------------------------------------------------------------------------------------------------------------------------------------------------------------|
| Deschamps et al. 2016 [6]<br>Retrospective cohort study<br>Period: 2010–2011<br>Location: Leuven; Aalst, Belgium<br>(multicenter)                                                                                                             | N: 97, 194 feet<br>Numbers below for feet:<br>Male: 68%<br>Age: 61.6 years<br>Type 2: 72%<br>Neuropathy: 51%<br>Risk classification: IWGDF 0:<br>41%, IWGDF 1: 3%, IWGDF 2:<br>12%, IWGDF 3: 44% | QUIPS: L-L-L-M-H-M<br>21-item score: 9/17  | At 42.7 months (mean):<br>Ulcerated: 7% ( $n = 7$ )                                                                                                                                                                                        | Barefoot PP (kPa):<br>Ulcerated: $1332.4 \pm 207.8$<br>Non-ulcerated: $814.8 \pm 247.6$                                                                                                                                                                                                                                                                                                                                                                                                                                        | Associated ( $r = 0.462$ , $p < 0.001$ ) §                                                                                                                                                                                                                                                                                                                  |
| Murray et al. 1996 [14]<br>Prospective cohort study<br>Period: not presented<br>Location: Manchester, UK<br>(multicenter)                                                                                                                     | N: 63<br>Male: 68%<br>Age: 62 (52; 67) years<br>Type 2: 60%<br>Neuropathy: 100%<br>Risk classification: not<br>presented                                                                         | QUIPS: M-L-M-M-H-M<br>21-item score: 10/17 | At 15.4 (10–22) months:<br>Ulcerated: 10% ( $n = 6$ )<br><br>At 15.4 (10–22) months:<br>Incidence of ulcers by individual<br>area of the foot:<br><981 kPa: 0.3% ulcerations ( $n = 3/886$ )<br>≥981 kPa: 1.6% ulcerations ( $n = 4/248$ ) | Barefoot PP (kPa):<br>Ulcerated: 1451 (1098; 1952)<br>Non-ulcerated: 1677 (1461; 2099)<br><br>Cut-off PP: ≥981 kPa                                                                                                                                                                                                                                                                                                                                                                                                             | Not associated ( $p = 0.14$ )<br><br>Associated (RR: 4.7, 95% CI: (1.2;<br>18.9), $p = 0.04$ )                                                                                                                                                                                                                                                              |
| Qiu et al. 2015 [18]<br>Prospective before and after study<br>Period: 2012<br>Location: Shijazhuang, Hebei, China<br>(monocenter)                                                                                                             | N: 65<br>Male: 45%<br>Age: 59 (40–78) years<br>Type 2: 100%<br>Neuropathy: not presented<br>Risk classification: not<br>presented                                                                | QUIPS: L-L-M-H-M-H<br>21-item score: 8/17  | At 2 years:<br>Ulcerated: 3% ( $n = 2$ )                                                                                                                                                                                                   | Barefoot PP change over 2 years in the<br>metatarsals:<br>Barefoot PP changes per group not<br>presented.<br>Barefoot PTI change over 2 years in the<br>metatarsals:<br>Barefoot PTI changes per group not<br>presented.                                                                                                                                                                                                                                                                                                       | Not associated ( $p > 0.05$ )<br><br>Not associated ( $p > 0.05$ )                                                                                                                                                                                                                                                                                          |
| Waaijman et al. 2014 [22] <sup>†</sup><br>Prospective randomized controlled<br>trial<br>Period: 2007–2010<br>Location: the Netherlands<br>(multicenter)<br>Shoes: custom-made orthopedic<br>footwear with or without pressure<br>optimization | N: 171<br>Male: 82.5%<br>Age: $63.3 \pm 10.1$ years<br>Type 2: 71.3%<br>Neuropathy: 100%<br>Risk classification: IWGDF 3:<br>100%                                                                | QUIPS: L-M-M-L-L-L<br>21-item score: 12/17 | At 18 months:<br>Plantar ulcers: 42% ( $n = 71$ )<br><br>At 18 months:<br>Ulcers from unrecognized<br>trauma: 24% ( $n = 41$ )                                                                                                             | Barefoot PP (kPa):<br>Plantar ulcers: $1042 \pm 260$<br>No plantar ulcers: $935 \pm 307$<br>In-shoe PP (measured quarterly during<br>follow-up) (kPa):<br>Plantar ulcers: $261 \pm 83$<br>No plantar ulcers: $246 \pm 77$<br>Barefoot PP (kPa):<br>Ulcers from unrecognized trauma: $849 \pm 375$<br>No ulcers from unrecognized trauma:<br>$699 \pm 393$<br>In-shoe PP (measured quarterly during<br>follow-up) (kPa)<br>Ulcers from unrecognized trauma: $212 \pm 99$<br>No ulcers from unrecognized trauma:<br>$178 \pm 82$ | Associated (OR: 1.18, 95% CI:<br>(1.09; 1.27), $p < 0.0001$ )<br><br>Not associated (OR: 1.21, 95%<br>CI: (0.95; 1.53), $p = 0.120$ )<br><br>Associated (OR: 1.12, 95% CI:<br>(1.05; 1.21), $p = 0.001$ (univariate),<br>OR: 1.11, 95% CI: (1.00; 1.22), $p =$<br>0.040 (multivariate))<br><br>Associated (OR: 1.38, 95% CI:<br>(1.05; 1.81), $p = 0.023$ ) |
| Ledoux et al. 2013 [11]<br>Prospective cohort study<br>Period: 1996–2002                                                                                                                                                                      | N: 591<br>Male: 98.1%<br>Age: 67 years                                                                                                                                                           | QUIPS: L-M-M-M-L-L<br>21-item score: 11/17 | At 2.4 (0–6.2) years:<br>Ulcerated: 8% ( $n = 47$ )                                                                                                                                                                                        | In-shoe PP (kPa):<br>Ulcerated: 219<br>Non-ulcerated: 194                                                                                                                                                                                                                                                                                                                                                                                                                                                                      | Not associated (HR: 1.27, 95%<br>CI: (0.89; 1.74), $p = 0.171$ )                                                                                                                                                                                                                                                                                            |

|                                                        |                                                                                |                                                            |                                                               |
|--------------------------------------------------------|--------------------------------------------------------------------------------|------------------------------------------------------------|---------------------------------------------------------------|
| Location: WA, USA (monocenter)<br>Shoes: "usual" shoes | Type 2: not presented<br>Neuropathy: 50%<br>Risk classification: not presented | In-shoe PTI (kPa-s):<br>Ulcerated: 89<br>Non-ulcerated: 79 | Not associated (HR: 1.25, 95% CI: (0.94; 1.52), $p = 0.115$ ) |
|--------------------------------------------------------|--------------------------------------------------------------------------------|------------------------------------------------------------|---------------------------------------------------------------|

All plantar pressures are measured during baseline unless otherwise mentioned. Results expressed as mean  $\pm$  standard deviation, median (quartile 1; quartile 3) or mean (minimum-maximum). Abbreviations: N = number of participants, type 2 = type 2 diabetes, PP = peak pressure, PTI = peak pressure gradient, kPa = kilo Pascal, kPa-s = kilo Pascal times seconds, 95% CI = 95% confidence interval, OR = odds ratio, RR = relative ratio, HR = hazard ratio, SMD = standardized mean difference,  $r$  = Pearson correlation coefficient. Z = standard score of overall effect. Quips domains: (1) Study participation, (2) Study attrition, (3) Prognostic factor measurement, (4) Outcome measurement, (5) Study confounding, (6) Statistical analysis and reporting. L = low, M = moderate and H = high risk of bias. \* 10 participants less in Caselli et al. 2002 than in Pham et al. 2000, reason of exclusion undefined in Caselli et al. 2002. The results of "Barefoot PP (kPa)" can be found in Pham et al. 2000, the results of "Barefoot cut-off PP  $\geq 588$  kPa" can be found in both Pham et al. 2000 and Caselli et al. 2002 and the results of "Barefoot forefoot-to-rearfoot PP ratio  $>2$ " can be found in Caselli et al. 2002. † Lavery et al. 2003 eliminated participants without a loss of protective sensation for this association, but the number of participants for this group is not presented. ‡ 36 participants less in Grimm et al. 2004 than in Kästenbauer et al. 2001, 151 of the 187 participants completed the study per protocol and that constituted the basis of the analysis of Grimm et al. 2004. The result of "Barefoot cut-off PP  $> 2$  SD" can be found in Kästenbauer et al. 2001 and the results of "Barefoot PP (kPa)" can be found in Grimm et al. 2004. § Deschamps et al. 2016, analysis based on 109 participants (218 feet) and 7 ulcerations using data provided by the authors. † Waaajman et al. 2014, plantar ulcers = any plantar ulcer; ulcers from unrecognized trauma = ulcer recurrence at previous ulcer location and not to be the result of acute trauma. A significance level of  $p < 0.10$  was used.

**Table S5.** Weight-bearing activity - ulcer development.

| Reference                                                                                                                              | Population                                                                                                                                           | Risk of Bias                               | Ulcer Outcome                                                                                                                                                   | Factor + Outcomes                                                                                                                                                                                                                                                                       | Conclusion                                                                                                                                                                                             |
|----------------------------------------------------------------------------------------------------------------------------------------|------------------------------------------------------------------------------------------------------------------------------------------------------|--------------------------------------------|-----------------------------------------------------------------------------------------------------------------------------------------------------------------|-----------------------------------------------------------------------------------------------------------------------------------------------------------------------------------------------------------------------------------------------------------------------------------------|--------------------------------------------------------------------------------------------------------------------------------------------------------------------------------------------------------|
| Armstrong et al. 2004 [2]<br>Prospective cohort study<br>Period: not presented<br>Location: USA (not presented)                        | N: 100<br>Male: 95%<br>Age: $68.5 \pm 10.0$ years<br>Type 2: not presented<br>Neuropathy: 100%<br>Risk classification: IWGDF 2: 68% and IWGDF 3: 32% | QUIPS: H-L-M-H-H-M<br>21-item score: 8/17  | At $37.1 \pm 12.3$ weeks (mean):<br>Ulcerated: 8% ( $n = 8$ )                                                                                                   | Average daily activity* (entire study period):<br>Ulcerated: $809.0 \pm 612.2$<br>Non-ulcerated: $1394.5 \pm 868.5$<br><br>Coefficient of variation in daily activity (%):<br>Ulcerated: $96.4 \pm 50.3$<br>Non-ulcerated: $44.7 \pm 15.4$                                              | Associated ( $p = 0.03$ )<br><br><br>Associated ( $p = 0.0001$ )                                                                                                                                       |
| Lemaster et al. 2003 [12]<br>Prospective cohort study<br>Period: 1997–1998<br>Location: WA, USA (multicenter)                          | N: 390<br>Male: 77%<br>Age: $62.5 \pm 9.0$ years<br>Type 2: not presented<br>Neuropathy: 58%<br>Risk classification: IWGDF 3: 100%                   | QUIPS: M-L-M-L-L-L<br>21-item score: 11/17 | At 2 years:<br>Least active: 17% ulcerated ( $n = 22/133$ )<br>Moderately active: 13% ulcerated ( $n = 18/134$ )<br>Most active: 13% ulcerated ( $n = 16/123$ ) | Activity group (activity measured every 17 <sup>th</sup> week during follow-up):<br>Least active: $<4.5$ h per day<br>Moderately active: $4.5$ – $7.4$ h per day<br>Most active: $\geq 7.5$ h per day                                                                                   | Not associated ( $p > 0.05$ )                                                                                                                                                                          |
| Waaajman et al. 2014 [22] †<br>Prospective randomized controlled trial<br>Period: 2007–2010<br>Location: the Netherlands (multicenter) | N: 171<br>Male: 82.5%<br>Age: $63.3 \pm 10.1$ years<br>Type 2: 71.3%<br>Neuropathy: 100%<br>Risk classification: IWGDF 3: 100%                       | QUIPS: L-M-M-L-L-L<br>21-item score: 12/17 | At 18 months:<br>Plantar ulcers: 42% ( $n = 71$ )                                                                                                               | Steps per day (7-day period $<3$ months after baseline):<br>Plantar ulcers: $6476 \pm 2574$<br>No plantar ulcers: $6874 \pm 3980$<br><br>Variation in steps per day (7-day period $<3$ months after baseline):<br>Plantar ulcers: $2136 \pm 1098$<br>No plantar ulcers: $2552 \pm 1586$ | Not associated (OR: 0.99, 95% CI: (0.97; 1.01), $p = 0.360$ )<br><br>Associated (OR: 0.95, 95% CI: (0.90; 0.99), $p = 0.023$ (univariate), OR: 0.93, 95% CI: (0.89; 0.99), $p = 0.012$ (multivariate)) |

|                                         |                                    |                      |  |                                                                        |                                                                                                                                                                                                                                                                                                                                                                            |                                                                                                                                                                                                                                   |
|-----------------------------------------|------------------------------------|----------------------|--|------------------------------------------------------------------------|----------------------------------------------------------------------------------------------------------------------------------------------------------------------------------------------------------------------------------------------------------------------------------------------------------------------------------------------------------------------------|-----------------------------------------------------------------------------------------------------------------------------------------------------------------------------------------------------------------------------------|
|                                         |                                    |                      |  | At 18 months:<br>Ulcers from unrecognized trauma: 24% ( <i>n</i> = 41) | <p>Steps per day (7-day period &lt;3 months after baseline):</p> <p>Ulcers from unrecognized trauma: 6418 ± 2662</p> <p>No ulcers from unrecognized trauma: 6808 ± 3714</p> <hr/> <p>Variation in steps per day (7-day period &lt;3 months after baseline):</p> <p>Ulcers from unrecognized trauma: 2124 ± 1156</p> <p>No ulcers from unrecognized trauma: 2468 ± 1494</p> | <p>Not associated (OR: 0.99, 95% CI: (0.97; 1.01), <i>p</i> = 0.404)</p> <hr/> <p>Associated (OR: 0.96, 95% CI: (0.91; 1.01), <i>p</i> = 0.096 (univariate), OR: 0.91, 95% CI: (0.86; 0.96), <i>p</i> = 0.001 (multivariate))</p> |
| Mueller et al. 2013 [13]                | <i>N</i> : 29                      |                      |  |                                                                        | Steps per day (baseline)                                                                                                                                                                                                                                                                                                                                                   |                                                                                                                                                                                                                                   |
| Prospective randomized controlled trial | Male: 59%                          | QUIPS: L-L-L-L-H-M   |  | At 12 weeks:                                                           | Ulcerated: 5360 ± 1673                                                                                                                                                                                                                                                                                                                                                     |                                                                                                                                                                                                                                   |
| Period: 2009–2011                       | Age: 64.5 ± 12.5 years             | 21-item score: 15/17 |  | Ulcerated: 10% ( <i>n</i> = 3)                                         | Non-ulcerated: 5717 ± 1751                                                                                                                                                                                                                                                                                                                                                 | Number of ulcerations too low to assess association.                                                                                                                                                                              |
| Location: WA, USA (monocenter)          | Type 2: 100%                       |                      |  |                                                                        | Steps per day (12 weeks)                                                                                                                                                                                                                                                                                                                                                   |                                                                                                                                                                                                                                   |
|                                         | Neuropathy: 100%                   |                      |  |                                                                        | Ulcerated: 4654 ± 1211                                                                                                                                                                                                                                                                                                                                                     |                                                                                                                                                                                                                                   |
|                                         | Risk classification: not presented |                      |  |                                                                        | Non-ulcerated: 5941 ± 1751                                                                                                                                                                                                                                                                                                                                                 |                                                                                                                                                                                                                                   |
| Schneider et al. 2019 [19]              | <i>N</i> : 12                      |                      |  |                                                                        | Steps per day (baseline):                                                                                                                                                                                                                                                                                                                                                  |                                                                                                                                                                                                                                   |
| Prospective mixed methods study         | Male: 33.3%                        | QUIPS: H-M-L-H-H-M   |  | At 20 weeks:                                                           | Ulcerated: 1883.00                                                                                                                                                                                                                                                                                                                                                         |                                                                                                                                                                                                                                   |
| Period: not presented                   | Age: 59.92 ± 8.68 years            | 21-item score: 11/17 |  | Ulcerated: 8% ( <i>n</i> = 1)                                          | Non-ulcerated: 3871.80 ± 1367.88                                                                                                                                                                                                                                                                                                                                           | Number of ulcerations too low to assess association.                                                                                                                                                                              |
| Location: IL, USA (monocenter)          | Type 2: 91.7%                      |                      |  |                                                                        | Steps per day (after 20 weeks):                                                                                                                                                                                                                                                                                                                                            |                                                                                                                                                                                                                                   |
|                                         | Neuropathy: 100%                   |                      |  |                                                                        | Ulcerated: 2957.00                                                                                                                                                                                                                                                                                                                                                         |                                                                                                                                                                                                                                   |
|                                         | Risk classification: not presented |                      |  |                                                                        | Non-ulcerated: 4342.00 ± 1292.09                                                                                                                                                                                                                                                                                                                                           |                                                                                                                                                                                                                                   |

Results expressed as mean ± standard deviation. Abbreviations: *N* = number of participants, type 2 = type 2 diabetes, CI = 95% confidence interval, OR = odds ratio. Quips domains: (1) Study participation, (2) Study attrition, (3) Prognostic factor measurement, (4) Outcome measurement, (5) Study confounding, (6) Statistical analysis and reporting. L = low, M = moderate and H = high risk of bias. \* Armstrong et al. 2004, daily activity measured in activity units, which is an undefined measure in Armstrong et al. 2004. † Waaijman et al. 2014, plantar ulcers = any plantar ulcer; ulcers from unrecognized trauma = ulcer recurrence at previous ulcer location and not to be the result of acute trauma. A significance level of *p* < 0.10 was used.

**Table S6.** Footwear adherence - ulcer development.

| Reference                                                                                                                              | Population                                                                                                                     | Risk of Bias                               | Ulcer Outcome                                                                                                                                                                                                                                  | Factor + Outcomes                                                                                                                                                                                                                             | Conclusion                                                                                                                                 |
|----------------------------------------------------------------------------------------------------------------------------------------|--------------------------------------------------------------------------------------------------------------------------------|--------------------------------------------|------------------------------------------------------------------------------------------------------------------------------------------------------------------------------------------------------------------------------------------------|-----------------------------------------------------------------------------------------------------------------------------------------------------------------------------------------------------------------------------------------------|--------------------------------------------------------------------------------------------------------------------------------------------|
| Chantelau et al. 1994 [3]<br>Prospective cohort study<br>Period: not presented<br>Location: Düsseldorf, Germany (monocenter)           | N: 51<br>Male: 59%<br>Age: 63 (60; 67) years<br>Type 2: 71%<br>Neuropathy: not presented<br>Risk classification: IWGDF 3: 100% | QUIPS: H-L-M-H-H-M<br>21-item score: 11/17 | At 4 years:<br>≥9.6 / 16 h per day: 54% ulcerated ( <i>n</i> = 20/37)<br><9.6 / 16 h per day: 100% ulcerated ( <i>n</i> = 14/14)                                                                                                               | Cut-off adherence ≥9.6/16 h per day                                                                                                                                                                                                           | Associated ( <i>p</i> = 0.0002)                                                                                                            |
| Connor et al. 2004 [4]<br>Retrospective cohort study<br>Period: 1996-not presented<br>Location: Hereford, UK (monocenter)              | N: 83<br>Male: 67%<br>Age: 57.0 years<br>Type 2: 69%<br>Neuropathy: 100%<br>Risk classification: IWGDF 3: 100%                 | QUIPS: M-H-H-H-H-M<br>21-item score: 9/17  | After minimum 2 years:<br>≥3.5 ulcers per foot per 10 years: 64% of ulcers ( <i>n</i> = 207), 37% of participants ( <i>n</i> = 31)<br><3.5 ulcers per foot per 10 years: 36% of ulcers ( <i>n</i> = 114), 63% of participants ( <i>n</i> = 52) | % of participants non-adherent to footwear:<br>≥3.5 ulcers per foot per 10 years: 55<br><3.5 ulcers per foot per 10 years: 35                                                                                                                 | Associated ( <i>p</i> = 0.037)                                                                                                             |
| Waaijman et al. 2014 [22] *<br>Prospective randomized controlled trial<br>Period: 2007–2010<br>Location: the Netherlands (multicenter) | N: 171<br>Male: 82.5%<br>Age: 63.3 ± 10.1 years<br>Type 2: 71.3%<br>Neuropathy: 100%<br>Risk classification: IWGDF 3: 100%     | QUIPS: L-M-M-L-L-L<br>21-item score: 12/17 | At 18 months:<br>Plantar ulcers: 42% ( <i>n</i> = 71)<br><br>At 18 months:<br>Ulcers from unrecognized trauma: 24% ( <i>n</i> = 41)                                                                                                            | % adherence (7-day period < 3 months after baseline):<br>Plantar ulcers: 73.1 ± 24.7<br>No plantar ulcers: 72.7 ± 24.1<br><br>% adherence:<br>Ulcers from unrecognized trauma: 72.2 ± 26.2<br>No ulcers from unrecognized trauma: 73.1 ± 23.7 | Not associated (OR: 1.00, 95% CI: (0.99; 1.01), <i>p</i> = 0.989)<br><br>Not associated (OR: 1.00, 95% CI: (0.98; 1.01), <i>p</i> = 0.823) |

Results expressed as mean ± standard deviation or median (quartile 1; quartile 3). Abbreviations: N = number of participants, type 2 = type 2 diabetes, CI = 95% confidence interval, OR = odds ratio. Quips domains: (1) Study participation, (2) Study attrition, (3) Prognostic factor measurement, (4) Outcome measurement, (5) Study confounding, (6) Statistical analysis and reporting. L = low, M = moderate and H = high risk of bias. \* Waaijman et al. 2014, plantar ulcers = any plantar ulcer; ulcers from unrecognized trauma = ulcer recurrence at previous ulcer location and not to be the result of acute trauma. A significance level of *p* < 0.10 was used.

**Table S7.** Cumulative plantar tissue stress - ulcer development.

| Reference                                                                                                                                                                                                              | Population                                                                                                                 | Risk of Bias                               | Ulcer Outcome                                                                                                                       | Factor + Outcomes                                                                                                                                                                                                                                                                                                                                                                                                                                                                                                                                                       | Conclusion                                                                                                                                                                                                                                                                                            |
|------------------------------------------------------------------------------------------------------------------------------------------------------------------------------------------------------------------------|----------------------------------------------------------------------------------------------------------------------------|--------------------------------------------|-------------------------------------------------------------------------------------------------------------------------------------|-------------------------------------------------------------------------------------------------------------------------------------------------------------------------------------------------------------------------------------------------------------------------------------------------------------------------------------------------------------------------------------------------------------------------------------------------------------------------------------------------------------------------------------------------------------------------|-------------------------------------------------------------------------------------------------------------------------------------------------------------------------------------------------------------------------------------------------------------------------------------------------------|
| Waaijman et al. 2014 [22] *<br>Prospective randomized controlled trial<br>Period: 2007–2010<br>Location: the Netherlands (multicenter)<br>Shoes: custom-made orthopedic footwear with or without pressure optimization | N: 171<br>Male: 82.5%<br>Age: 63.3 ± 10.1 years<br>Type 2: 71.3%<br>Neuropathy: 100%<br>Risk classification: IWGDF 3: 100% | QUIPS: L-M-M-L-L-L<br>21-item score: 12/17 | At 18 months:<br>Plantar ulcers: 42% ( <i>n</i> = 71)<br><br>At 18 months:<br>Ulcers from unrecognized trauma: 24% ( <i>n</i> = 41) | Cumulative plantar tissue stress (7-day period <3 months after baseline) (MPa·s/day):<br>Plantar ulcers: 715 ± 538<br>No plantar ulcers: 652 ± 436<br>% of participants with in-shoe PP at plantar foot <200 kPa and adherence >80%:<br>Plantar ulcers: 9.0<br>No plantar ulcers: 10.2<br><br>Cumulative plantar tissue stress (MPa·s/day):<br>Ulcers from unrecognized trauma: 423 ± 292<br>No ulcers from unrecognized trauma: 361 ± 279<br>% of participants with in-shoe PP at previous ulcer <200 kPa and adherence >80%:<br>Ulcers from unrecognized trauma: 17.9 | Not associated (OR: 1.00, 95% CI: (1.00; 1.00), <i>p</i> = 0.453)<br><br>Associated (OR: 0.47, 95% CI: (0.26; 0.85), <i>p</i> = 0.012)<br><br>Not associated (OR: 1.00, 95% CI: (1.00; 1.00), <i>p</i> = 0.162)<br><br>Associated (OR: 0.5, 95% CI: (0.28; 0.89), <i>p</i> = 0.019 (univariate), (OR: |



No ulcers from unrecognized trauma: 27.3  
0.43, 95% CI: (0.20; 0.94),  $p = 0.033$   
(multivariate))

Results expressed as mean  $\pm$  standard deviation. Abbreviations: N = number of participants, type 2 = type 2 diabetes, MPa·s/day = MegaPascal times seconds per day, CI = 95% confidence interval, OR = odds ratio. Quips domains: (1) Study participation, (2) Study attrition, (3) Prognostic factor measurement, (4) Outcome measurement, (5) Study confounding, (6) Statistical analysis and reporting. L = low, M = moderate and H = high risk of bias. \* Waaijman et al. 2014, plantar ulcers = any plantar ulcer; ulcers from unrecognized trauma = ulcer recurrence at previous ulcer location and not to be the result of acute trauma. A significance level of  $p < 0.10$  was used.

**Table S8.** Plantar pressure - ulcer healing.

| Reference                                                                                                                                                                                                | Population                                                                                                                                                                                                                                                                                        | Risk of bias                               | Ulcer outcome                                                                                                                            | Factor + outcomes                                                                                                                                                                                             | Conclusion                                                                                                                                                                                       |
|----------------------------------------------------------------------------------------------------------------------------------------------------------------------------------------------------------|---------------------------------------------------------------------------------------------------------------------------------------------------------------------------------------------------------------------------------------------------------------------------------------------------|--------------------------------------------|------------------------------------------------------------------------------------------------------------------------------------------|---------------------------------------------------------------------------------------------------------------------------------------------------------------------------------------------------------------|--------------------------------------------------------------------------------------------------------------------------------------------------------------------------------------------------|
| Armstrong et al. 1998 [1]<br>Prospective cohort study<br>Period: not presented<br>Location: San Antonio, TX, USA<br>(monocenter)                                                                         | N: 25<br>Male: 68%<br>Age: 52.4 $\pm$ 11.6 years<br>Type 2: 84%<br>Neuropathy: 100%<br>Ulcer classification: Meggitt-Wagner grade 1 in depth: 100%<br>Location: hallux: 4%, MTP1: 52%, MTP2: 12%, MTP3: 8%,<br>MTP5: 12%, lateral midfoot: 4% and heel: 8%<br>Area: 7.7 $\pm$ 4.0 cm <sup>2</sup> | QUIPS: H-L-L-H-L-L<br>21-item score: 11/17 | Days until ulcer healing:<br>>990 kPa: 53.4 $\pm$ 31.4<br><990 kPa: 33.1 $\pm$ 13.0<br>Number of participants per<br>group not presented | Barefoot cut-off PP > 990<br>kPa                                                                                                                                                                              | Not associated ( $p = 0.05$ )                                                                                                                                                                    |
| Van Netten et al. 2018 [21]<br>Prospective cohort study<br>Period: 2004–2013<br>Location: the Netherlands and<br>Germany (multicenter)<br>Device: removable knee-high or<br>ankle-high offloading device | N: 31<br>Male: 81%<br>Age: 60 $\pm$ 12.6 years<br>Type 2: 94%<br>Neuropathy: 100%<br>Ulcer classification: 68% Texas 1A and 32% Texas 2A<br>Location: hallux: 45%, MTP1: 26%, MTP2–5: 29%<br>Area: 1.1 $\pm$ 0.9 cm <sup>2</sup>                                                                  | QUIPS: L-L-L-M-M-M<br>21-item score: 13/17 | Mean days until ulcer healing:<br>38.8 $\pm$ 21.3                                                                                        | Mean barefoot PP (kPa):<br>927 $\pm$ 143                                                                                                                                                                      | Associated (95% CI:<br>(0.1; 0.91), $p < 0.03$ )                                                                                                                                                 |
| Jarl et al. 2017 [7]<br>Prospective cohort study<br>Period: not presented<br>Location: Uppsala, Sweden<br>(monocenter)<br>Device: non-removable ankle-high<br>device                                     | N: 7<br>Male: 100%<br>Age: 63 (35–80) years<br>Type 2: 100%<br>Neuropathy: 100%<br>Ulcer classification: Wagner grade 1: 57%, Wagner grade 2:<br>43%<br>Location: MTP1: 57%, MTP3: 14%, MTP4: 14%, MTP5: 14%<br>Area: 0.5 (0.2–2.0) cm <sup>2</sup>                                               | QUIPS: H-L-M-M-H-H<br>21-item score: 12/17 | At 12 weeks:<br>Healed: 68% ( $n = 21$ )<br><br>Days until ulcer healing:<br>49 (8–160)                                                  | In-device PP (2 weeks after<br>baseline) (kPa)<br>Healed: 108 $\pm$ 56<br>Non-healed: 107 $\pm$ 57<br><br>In-device PTI (2 weeks after<br>baseline) (kPa·s)<br>Healed: 45 $\pm$ 29<br>Non-healed: 38 $\pm$ 17 | Not associated (95% CI:<br>(-45; 44), $p = 0.97$ , $d = 0.02$ )<br><br>Not associated (95% CI:<br>(-28; 13), $p = 0.44$ , $d = 0.29$ )<br><br>Not associated ( $\rho = -0.600$ , $p = 0.208$ ) * |

All plantar pressures are measured during baseline unless otherwise mentioned. Results expressed as mean  $\pm$  standard deviation or median (minimum–maximum). Abbreviations: N = number of participants, type 2 = type 2 diabetes, PP = peak pressure, PTI = peak pressure gradient, kPa = kilo Pascal, kPa·s = kilo Pascal times seconds,  $\rho$  = spearman's rho, 95% CI = confidence interval,  $d$  = effect size. Quips domains: (1) Study participation, (2) Study attrition, (3) Prognostic factor measurement, (4) Outcome measurement, (5) Study confounding, (6) Statistical analysis and reporting. L = low, M = moderate and H = high risk of bias. \* Jarl et al. 2017, analysis based on 6 participants using anonymized data provided by the author.

**Table S9.** Weight-bearing activity - ulcer healing.

| Reference                                                                                                                                         | Population                                                                                                                                                                                                                                  | Risk of bias                               | Ulcer outcome                                  | Factor + outcomes                                                                                          | Conclusion                                                              |
|---------------------------------------------------------------------------------------------------------------------------------------------------|---------------------------------------------------------------------------------------------------------------------------------------------------------------------------------------------------------------------------------------------|--------------------------------------------|------------------------------------------------|------------------------------------------------------------------------------------------------------------|-------------------------------------------------------------------------|
| Najafi et al. 2017 [15]<br>Prospective randomized controlled trial<br>Period: not presented<br>Location: Doha, Qatar and AZ, USA<br>(multicenter) | N: 49<br>Male: 92%<br>Age: 53.7 ± 7.7 years<br>Type 2: not presented<br>Neuropathy: 100%<br>Ulcer classification: noninfected, nonischemic, plantar neuropathic ulcers<br>Location: not presented<br>Area: 8.14 (0.16–39.0) cm <sup>2</sup> | QUIPS: H-M-M-L-H-H<br>21-item score: 12/17 | At 12 weeks:<br>Healed: 51% ( <i>n</i> = 22) * | Steps per day (baseline):<br>Healed: 5304 ± 3567<br>Non-healed: 4312 ± 2658                                | Not associated ( <i>p</i> = 0.398)                                      |
|                                                                                                                                                   |                                                                                                                                                                                                                                             |                                            |                                                | Steps per day (last visit or week before healing):<br>Healed: 2595 ± 2056<br>Non-healed: 5586 ± 3186       | Not associated ( <i>p</i> = 0.104)                                      |
|                                                                                                                                                   |                                                                                                                                                                                                                                             |                                            |                                                | Standing % of 24 hours (baseline):<br>Healed: 9.8 ± 5.3<br>Non-healed: 11.2 ± 6.7                          | Not associated ( <i>p</i> = 0.518)                                      |
|                                                                                                                                                   |                                                                                                                                                                                                                                             |                                            |                                                | Standing % of 24 hours (last visit or week before healing):<br>Healed: 5.7 ± 4.0<br>Non-healed: 11.4 ± 3.9 | Associated (OR: 0.663, <i>p</i> = 0.013)                                |
|                                                                                                                                                   |                                                                                                                                                                                                                                             |                                            |                                                |                                                                                                            |                                                                         |
| Van Netten et al. 2018 [21]<br>Prospective cohort study<br>Period: 2004–2013<br>Location: the Netherlands and Germany<br>(multicenter)            | N: 31<br>Male: 81%<br>Age: 60 ± 12.6 years<br>Type 2: 94%<br>Neuropathy: 100%<br>Ulcer classification: 68% Texas 1A and 32% Texas 2A<br>Location: hallux: 45%, MTP1: 26%, MTP2–5: 29%<br>Area: 1.1 ± 0.9 cm <sup>2</sup>                    | QUIPS: L-L-L-M-M-M<br>21-item score: 13/17 | At 12 weeks:<br>Healed: 68% ( <i>n</i> = 21)   | Steps per day (2 weeks after baseline):<br>Healed: 7222 ± 3272<br>Non-healed: 9706 ± 6520                  | Not associated (95% CI: (-541; 3023), <i>p</i> = 0.26, <i>d</i> = 0.48) |

Results expressed as mean ± standard deviation. Abbreviations: N = number of participants, type 2 = type 2 diabetes, CI = 95% confidence interval, OR = odds ratio, *d* = effect size. Quips domains: (1) Study participation, (2) Study attrition, (3) Prognostic factor measurement, (4) Outcome measurement, (5) Study confounding, (6) Statistical analysis and reporting. L = low, M = moderate and H = high risk of bias. \* Najafi et al. 2017, 6 participants were excluded due to development of infection, surgical closure of ulcer and missed follow-up appointments during follow-up.

**Table S10.** Device adherence - ulcer healing.

| Reference                                                                                                       | Population                                                                                                                                                                                                                                  | Risk of bias                               | Ulcer outcome                               | Factor + outcomes                                                                             | Conclusion                                            |
|-----------------------------------------------------------------------------------------------------------------|---------------------------------------------------------------------------------------------------------------------------------------------------------------------------------------------------------------------------------------------|--------------------------------------------|---------------------------------------------|-----------------------------------------------------------------------------------------------|-------------------------------------------------------|
| Crews et al. 2016 [5]<br>Prospective cohort study<br>Period: 2008–2012<br>Location: UK and USA<br>(multicenter) | N: 79<br>Male: 84%<br>Age: 56.5 ± 9.6 years<br>Type 2: 100%<br>Neuropathy: not presented<br>Ulcer classification: Texas 1A: 72%, Texas 1B: 12%, Texas 2A: 15%, Texas 2B: 1%<br>Location: not presented<br>Area: 23.0 ± 28.8 cm <sup>2</sup> | QUIPS: M-L-L-M-M-M<br>21-item score: 10/17 | At 6 weeks:<br>Healed: 24% ( <i>n</i> = 19) | % of activity for which off-loading device worn:<br>Healed: 57 ± 24<br>Non-healed: 59 ± 22    | No association ( <i>r</i> = -0.043, <i>p</i> = 0.705) |
|                                                                                                                 |                                                                                                                                                                                                                                             |                                            |                                             | Total adherent activity hours over 6 weeks:<br>Healed: 8126 ± 8161<br>Non-healed: 8216 ± 5566 | No association ( <i>r</i> = -0.006, <i>p</i> = 0.957) |
|                                                                                                                 |                                                                                                                                                                                                                                             |                                            |                                             | Mean % of activity for which off-loading device worn: 59 ± 22                                 | Associated ( <i>β</i> = -0.16, <i>p</i> = 0.038)      |
|                                                                                                                 |                                                                                                                                                                                                                                             |                                            |                                             |                                                                                               |                                                       |
|                                                                                                                 |                                                                                                                                                                                                                                             |                                            |                                             |                                                                                               |                                                       |

Results expressed as mean ± standard deviation. Abbreviations: N = number of participants, type 2 = type 2 diabetes, *r* = Pearson correlation, *β* = standardized coefficient: *β*. Quips domains: (1) Study participation, (2) Study attrition, (3) Prognostic factor measurement, (4) Outcome measurement, (5) Study confounding, (6) Statistical analysis and reporting. L = low, M = moderate and H = high risk of bias.

**Table S11.** Cumulative plantar tissue stress - ulcer healing.

| Reference                                                                                                                                                                                          | Population                                                                                                                                                                                                   | Risk of Bias                               | Ulcer Outcome                                                                                                                                                               | Factor + Outcomes                                                                                                   | Conclusion                                                            |
|----------------------------------------------------------------------------------------------------------------------------------------------------------------------------------------------------|--------------------------------------------------------------------------------------------------------------------------------------------------------------------------------------------------------------|--------------------------------------------|-----------------------------------------------------------------------------------------------------------------------------------------------------------------------------|---------------------------------------------------------------------------------------------------------------------|-----------------------------------------------------------------------|
| Van Netten et al. 2018 [21]<br>Prospective cohort study<br>Period: 2004–2013<br>Location: the Netherlands and Germany (multicenter)<br>Device: removable knee-high or ankle-high offloading device | N: 31<br>Male: 81%<br>Age: 60 ± 12.6 years<br>Type 2: 94%<br>Neuropathy: 100%<br>Ulcer classification: 68% Texas 1A and 32% Texas 2A<br>Location: hallux: 45%, MTP1: 26%, MTP2–5: 29%<br>Area: 1.1 ± 0.9 cm² | QUIPS: L-L-L-M-M-M<br>21-item score: 13/17 | At 12 weeks:<br>Healed: 68% ( <i>n</i> = 21)                                                                                                                                | Cumulative plantar tissue stress (2 weeks after baseline) (MPa·s/day)<br>Healed: 155 ± 131<br>Non-healed: 207 ± 215 | Not associated (95% CI: (-75; 179), <i>p</i> = 0.71, <i>d</i> = 0.29) |
|                                                                                                                                                                                                    | At 12 weeks, in the adherent group * ( <i>n</i> = 27):<br>≥75% ulcer area reduction at 4 weeks: 70% ( <i>n</i> = 19)<br><75% ulcer area reduction at 4 weeks: 30% ( <i>n</i> = 8)                            |                                            | Cumulative plantar tissue stress (2 weeks after baseline) (MPa·s/day)<br>≥75% ulcer area reduction at 4 weeks: 140 ± 137<br><75% ulcer area reduction at 4 weeks: 275 ± 209 | Not associated (95% CI: (-5; 275), <i>p</i> = 0.09, <i>d</i> = 0.76)                                                |                                                                       |

Results expressed as mean ± standard deviation. Abbreviations: *N* = number of participants, type 2 = type 2 diabetes, MPa s/day = Mega Pascal times seconds per day, *d* = effect size, CI = 95% confidence interval, OR = odds ratio. Quips domains: (1) Study participation, (2) Study attrition, (3) Prognostic factor measurement, (4) Outcome measurement, (5) Study confounding, (6) Statistical analysis and reporting. L = low, M = moderate and H = high risk of bias. \* Patients were classified as adherent when they self-reported to have worn their device >50% of the time while being inside and outside the house at ≥80% of their visits.

## References

- Armstrong, D.G.; Lavery, L.A.; Bushman, T.R. Peak foot pressures influence the healing time of diabetic foot ulcers treated with total contact casts. *J. Rehabil. Res. Dev.* **1998**, *35*, 1–5.
- Armstrong, D.G.; Lavery, L.A.; Holtz-Neiderer, K.; Mohler, M.J.; Wendel, C.S.; Nixon, B.P.; Boulton, A.J.M.M. Variability in Activity May Precede Diabetic Foot Ulceration. *Diabetes Care* **2004**, *27*, 1980–1984, doi:10.2337/diacare.27.8.1980.
- Chantelau, E.; Haage, P. An Audit of Cushioned Diabetic Footwear: Relation to Patient Compliance. *Diabet. Med.* **1994**, *11*, 114–116, doi:10.1111/j.1464-5491.1994.tb00240.x.
- Connor, H.; Mahdi, O.Z. Repetitive ulceration in neuropathic patients. *Diabetes Metab. Res. Rev.* **2004**, *20*, 23–28, doi:10.1002/dmrr.446.
- Crews, R.T.; Shen, B.J.; Campbell, L.; Lamont, P.J.; Boulton, A.J.M.; Peyrot, M.; Kirsner, R.S.; Vileikyte, L. Role and determinants of Adherence to off-loading in diabetic foot ulcer healing: A prospective investigation. *Diabetes Care* **2016**, *39*, 1371–1377, doi:10.2337/dc15-2373.
- Deschamps, K.; Matricali, G.A.; Desmet, D.; Roosen, P.; Keijsers, N.; Nobels, F.; Bruyninckx, H.; Staes, F. Efficacy measures associated to a plantar pressure based classification system in diabetic foot medicine. *Gait Posture* **2016**, *49*, 168–175, doi:10.1016/j.gaitpost.2016.07.009.
- Jarl, G.; Tranberg, R. An innovative sealed shoe to off-load and heal diabetic forefoot ulcers—a feasibility study. *Diabet. Foot Ankle* **2017**, *8*, 1–4, doi:10.1080/2000625X.2017.1348178.
- Kästenbauer, T.; Sauseng, S.; Sokol, G.; Auinger, M.; Irsigler, K. A prospective study of predictors for foot ulceration in type 2 diabetes. *J. Am. Podiatr. Med. Assoc.* **2001**, *91*, 343–350, doi:10.7547/87507315-91-7-343.
- Grimm, A.; Kastenbauer, T.; Sauseng, S.; Sokol, G.; Irsigler, K. Progression and distribution of plantar pressure in Type 2 diabetic patients. *Diabetes Nutr. Metab.* **2004**, *17*, 108–113.
- Lavery, L.A.; Armstrong, D.G.; Wunderlich, R.P.; Tredwell, J.; Boulton, A.J.M. Predictive value of foot pressure assessment as part of a population based diabetes disease management program. *Diabetes Care* **2003**, *26*, 1069–1073, doi:10.2337/diacare.26.4.1069.
- Ledoux, W.R.; Shofer, J.B.; Cowly, M.S.; Ahroni, J.H.; Cohen, V.; Boyko, E.J. Diabetic foot ulcer incidence in relation to plantar pressure magnitude and measurement location. *J. Diabetes Complicat.* **2013**, *27*, 621–626, doi:10.1093/qjmed/hcl140.

12. Lemaster, J.W.; Reiber, G.E.; Smith, D.G.; Heagerty, P.J.; Wallace, C. Daily weight-bearing activity does not increase the risk of diabetic foot ulcers. *Med. Sci. Sports Exerc.* **2003**, *35*, 1093–1099, doi:10.1249/01.MSS.0000074459.41029.75.
13. Mueller, M.J.; Tuttle, L.J.; Lemaster, J.W.; Strube, M.J.; McGill, J.B.; Hastings, M.K.; Sinacore, D.R. Weight-bearing versus nonweight-bearing exercise for persons with diabetes and peripheral neuropathy: A randomized controlled trial. *Arch. Phys. Med. Rehabil.* **2013**, *94*, 829–838, doi:10.1016/j.apmr.2012.12.015.
14. Murray, H.J.; Young, M.J.; Hollis, S.; Boulton, A.J.M. The Association Between Callus Formation, High Pressures and Neuropathy in Diabetic Foot Ulceration. *Diabet. Med.* **1996**, *13*, 979–982, doi:10.1002/(sici)1096-9136(199611)13:11<979::aid-dia267>3.3.co;2-1.
15. Najafi, B.; Grewal, G.S.; Bharara, M.; Menzies, R.; Talal, T.K.; Armstrong, D.G. Can't Stand the Pressure: The Association between Unprotected Standing, Walking, and Wound Healing in People with Diabetes. *J. Diabetes Sci. Technol.* **2017**, *11*, 657–667, doi:10.1177/1932296816662959.
16. Pham, H.; Armstrong, D.G.; Harvey, C.; Harkless, L.B.; Giurini, J.M.; Veves, A. Screening techniques to identify people at high risk for diabetic foot ulceration: A prospective multicenter trial. *Diabetes Care* **2000**, *23*, 606–611, doi:10.2337/diacare.23.5.606.
17. Caselli, A.; Pham, H.; Giurini, J.M.; Armstrong, D.G.; Veves, A. The forefoot-to-rearfoot plantar pressure ratio is increased in severe diabetic neuropathy and can predict foot ulceration. *Diabetes Care* **2002**, *25*, 1066–1071, doi:10.2337/diacare.25.6.1066.
18. Qiu, X.; Tian, D.H.; Han, C.L.; Chen, W.; Wang, Z.J.; Mu, Z.Y.; Liu, K.Z. Plantar pressure changes and correlating risk factors in Chinese patients with type 2 diabetes: Preliminary 2-year results of a prospective study. *Chin. Med. J. Engl.* **2015**, *128*, 3283–3291, doi:10.4103/0366-6999.171394.
19. Schneider, K.L.; Crews, R.T.; Subramanian, V.; Moxley, E.; Hwang, S.; DiLiberto, F.E.; Aylward, L.; Bean, J.; Yalla, S. Feasibility of a Low-Intensity, Technology-Based Intervention for Increasing Physical Activity in Adults at Risk for a Diabetic Foot Ulcer: A Mixed-Methods Study. *J. Diabetes Sci. Technol.* **2019**, *13*, 857–868, doi:10.1177/1932296818822538.
20. Ulbrecht, J.S.; Hurley, T.; Mauger, D.T.; Cavanagh, P.R. Prevention of recurrent foot ulcers with plantar pressure-based in-shoe orthoses: The CareFUL prevention multicenter randomized controlled trial. *Diabetes Care* **2014**, *37*, 1982–1989, doi:10.2337/dc13-2956.
21. Van Netten, J.J.; van Baal, J.G.; Bril, A.; Wissink, M.; Bus, S.A. An exploratory study on differences in cumulative plantar tissue stress between healing and non-healing plantar neuropathic diabetic foot ulcers. *Clin. Biomech.* **2018**, *53*, 86–92, doi:10.1016/j.clinbiomech.2018.02.012.
22. Waaijman, R.; De Haart, M.; Arts, M.L.J.; Wever, D.; Verlouw, A.J.W.E.; Nollet, F.; Bus, S.A. Risk factors for plantar foot ulcer recurrence in neuropathic diabetic patients. *Diabetes Care* **2014**, *37*, 1697–1705, doi:10.2337/dc13-2470.
23. Crawford, F.; Inkster, M.; Kleijnen, J.; Fahey, T. Predicting foot ulcers in patients with diabetes: A systematic review and meta-analysis. *Q. J. Med.* **2007**, *100*, 65–86, doi:10.1093/qjmed/hcl140.
